# Supplementary material
Source: HighWire-hosted journal article supplement (https://adc.bmj.com/content/103/1/83)
Supplement: inline-supplementary-material-3 [file inline-supplementary-material-3.docx]

**Supplement Table 1 Palatability changes with days of treatment**

| **Compare Days** | **Prednisolone base** | | | | **Prednisolone Sodium Phosphate** | | | |
| --- | --- | --- | --- | --- | --- | --- | --- | --- |
| **SA** | | **UK** | | **SA** | | **UK** | |
| **Mean of taste** | **P-value** | **Mean of taste** | **P-value** | **Mean of taste** | **P-value** | **Mean of taste** | **P-value** |
| **Day 1 vs Day 2** | **1.12 vs 1.42** | **0.025*** | **1.39 vs 1.61** | **0.061** | **1.62 vs 2.11** | **0.001*** | **2.19 vs 2.21** | **0.075** |
| **Day 2 vs Day 3** | **1.42 vs 1.67** | **0.004*** | **1.61 vs 1.97** | **0.019*** | **2.11 vs 2.38** | **0.075** | **2.21 vs 2.54** | **0.136** |
| **Day 1 vs Day 3** | **1.12 vs 1.67** | **˂0.0001*** | **1.39 vs 1.97** | **0.01*** | **1.62 vs 2.38** | **˂0.0001*** | **2.19 vs 2.54** | **0.0451*** |

* Significant results, McNemar-Bowker test.

**Supplement Table 2 UK cost of different corticosteroid formulations**

| **Oral corticosteroids**  **(Drug Tariff price)** [14] | | **Price / unit** | **Treatment cost of one dose for child weighing 20kg receiving 2mg/kg/day of prednisolone or 0.3mg/kg/day of dexamethasone** |
| --- | --- | --- | --- |
| **Prednisolone base** | **Prednisolone 5mg tablets** | **3p/tablet** | **£0.24** |
| **Prednisolone 5mg/5ml oral solution unit dose** | **23p/ml** | **£9.20** |
| **Prednisolone 10mg/ml oral solution sugar free** | **£1.85/ml** | **£7.40** |
| **Prednisolone sodium phosphate** | **Prednisolone 5mg soluble tablets** | **£1.78/tablet** | **£14.24** |
| **Dexamethasone** | **Dexamethasone 2mg soluble tablets sugar free** | **68p/tablet** | **£2.04** |
| **Dexamethasone 2mg tablets** | **98p/tablet** | **£2.94** |
| **Dexamethasone 10mg/5ml oral solution sugar free** | **63p/ml** | **£1.89** |
| **Dexamethasone 2mg/5ml oral solution sugar free** | **28p/ml** | **£4.20** |
